# Supplementary material for: Charge generation by ultra-stretchable elastomeric electrets
Source: Royal Society of Chemistry journal article supplement (doi:10.1039/c6tc04956g), 2017-01-01
Supplement: c6tc04956g1.pdf [file c6tc04956g1.pdf]

## Electronic Supplementary Information

### Charge generation by ultra-stretchable elastomeric electrets

Yee Song Ko,<sup>a,b</sup> Frank A. Nüesch,<sup>a,b</sup> and Dorina M. Opris<sup>a\*</sup>

<sup>a.</sup> Swiss Federal Laboratories for Materials Science and Technology Empa, Laboratory for Functional Polymers, Überlandstr. 129, CH-8600, Dübendorf, Switzerland. [dorina.opris@empa.ch](mailto:dorina.opris@empa.ch)

<sup>b.</sup> École Polytechnique Fédérale de Lausanne (EPFL), Institut des Matériaux, Station 12, CH 1015, Lausanne, Switzerland.

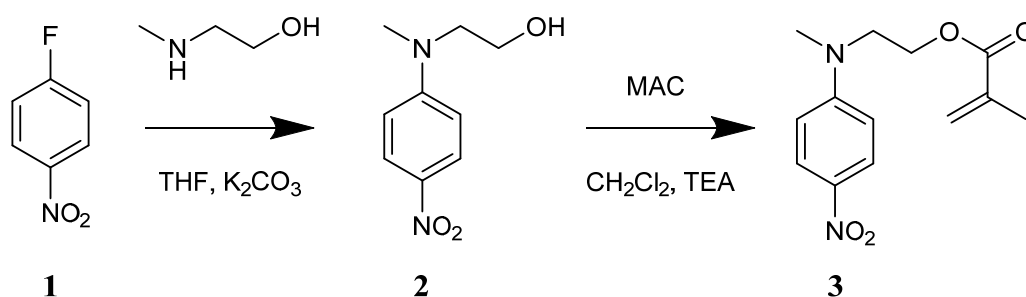

**Scheme S1.** Synthesis of the methacrylate functionalized nitroaniline derivate

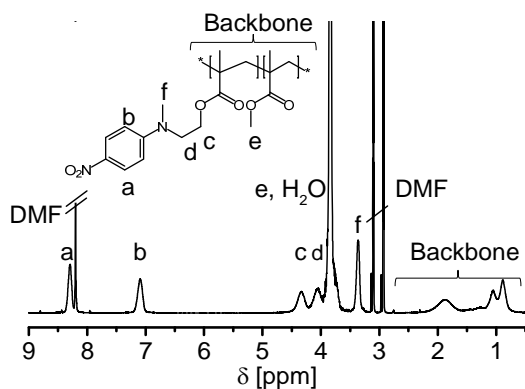

**Figure S1.** <sup>1</sup>H NMR spectrum of PMMA-co-NAMA in DMF-d<sub>7</sub>.

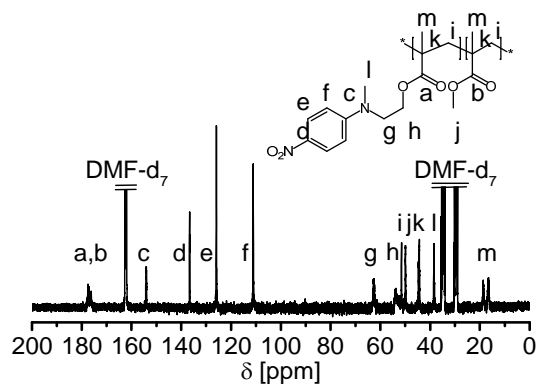

**Figure S2.**  $^{13}\text{C}$  NMR spectrum of PMMA-co-NAMA in DMF-d<sub>7</sub>.

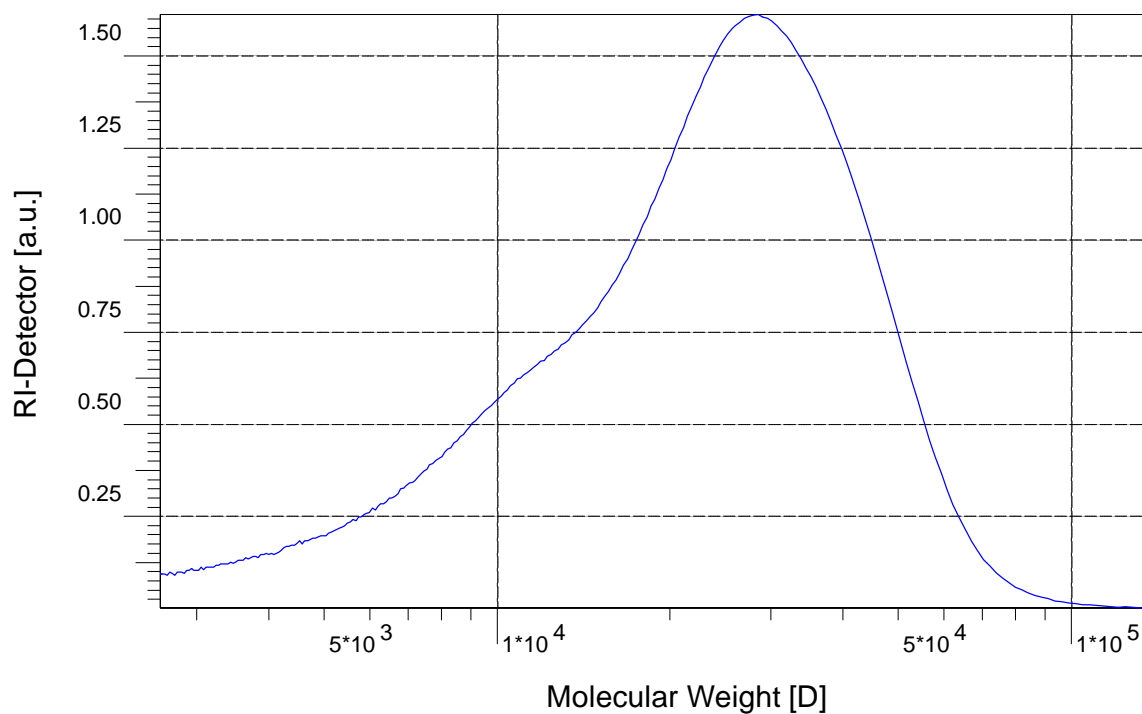

**Figure S3.** GPC curve of PMMA-co-NAMA in THF measured against a PMMA standard.

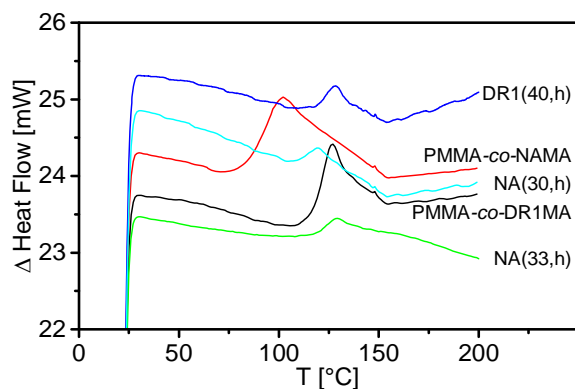

**Figure S4.** Second DSC run of the copolymers and the composite.

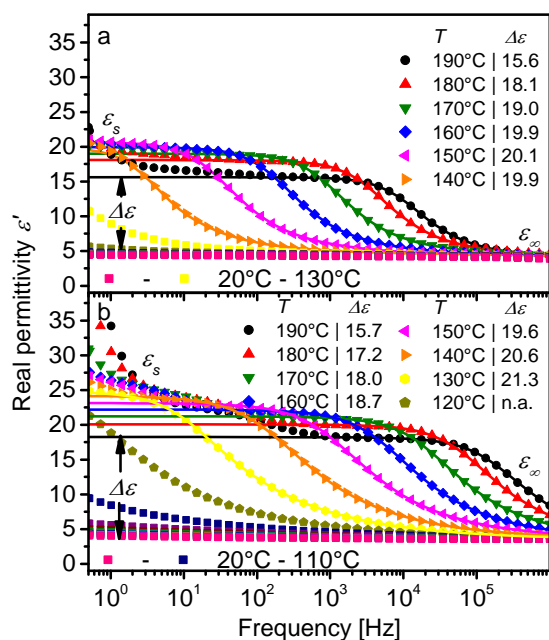

**Figure S5.** Real permittivity of the PMMA-co-DR1MA (a) and PMMA-co-NAMA (b). The measurements are represented by dots; the HN-fit is represented by lines. The corresponding  $\Delta\epsilon$  is noted next to the temperature. (a) is reproduced with permission from reference 1

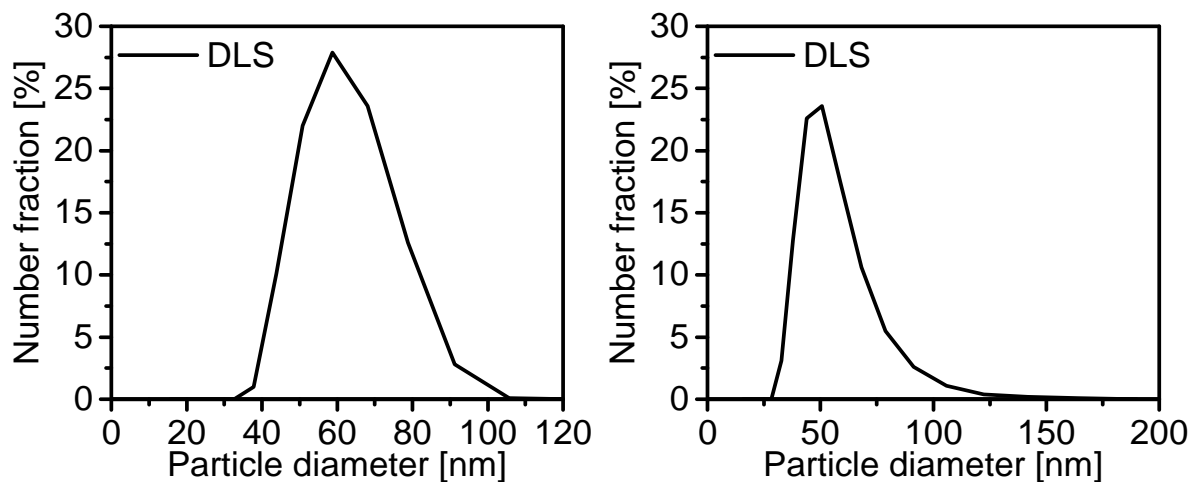

**Figure S6.** Dynamic light scattering measurement of PMMA-*co*-DR1MA (left) and PMMA-*co*-NAMA (right) particles after nanoprecipitation using a Malvern Zetasizer Nano ZS and averaged from 3 individual samples. The number average diameter of the particles are 56.6 nm and 58.3 nm with a standard deviation of 15.7 nm and 15.4 nm respectively.

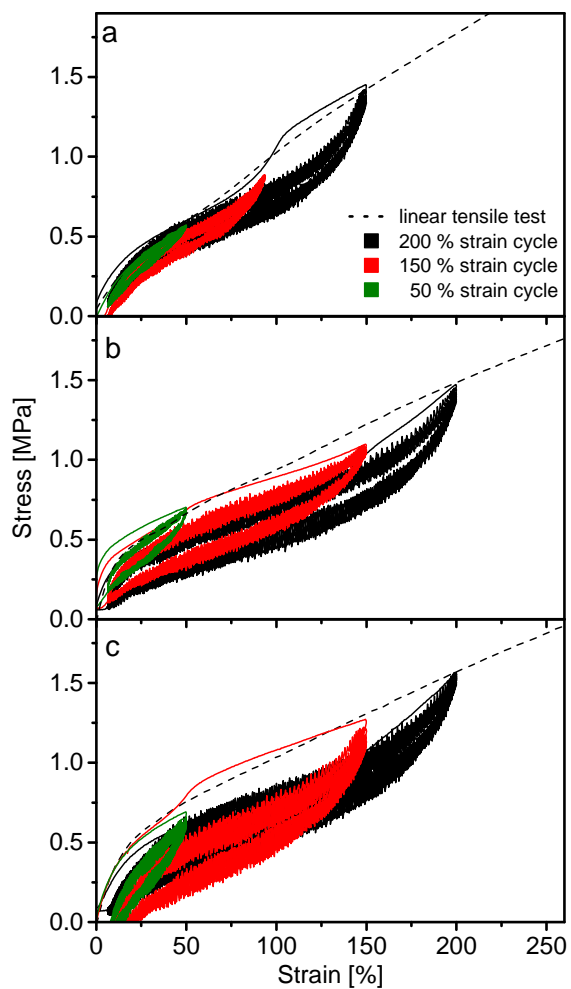

**Figure S7.** Representative cyclic mechanical tests of DR1(33,l) (a), DR1(40,h) (b), and NA(33,h) (c).

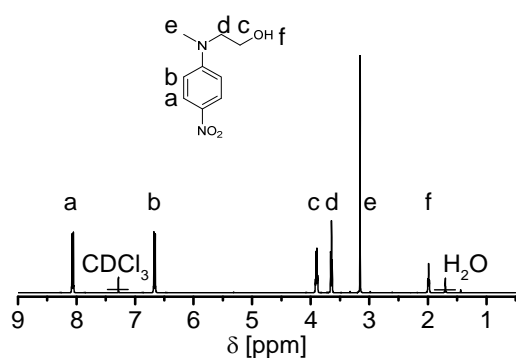

**Figure S8.**  $^1\text{H}$  NMR spectrum of 2-methyl(4-nitrophenyl)amine)ethanol in  $\text{CDCl}_3$ .

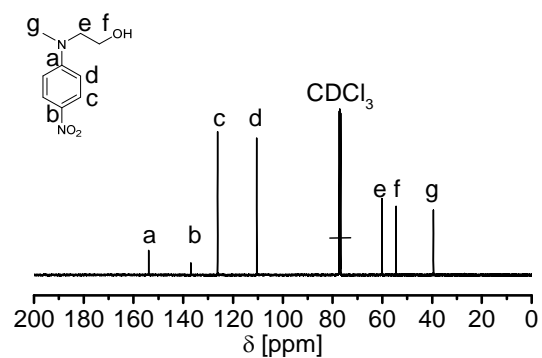

**Figure S9.** <sup>13</sup>C NMR spectrum of 2-methyl(4-nitrophenyl)amine)ethanol in CDCl<sub>3</sub>.

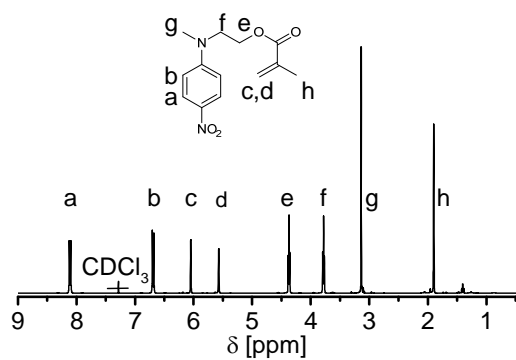

**Figure S10.** <sup>1</sup>H NMR spectrum of NAMA in CDCl<sub>3</sub>.

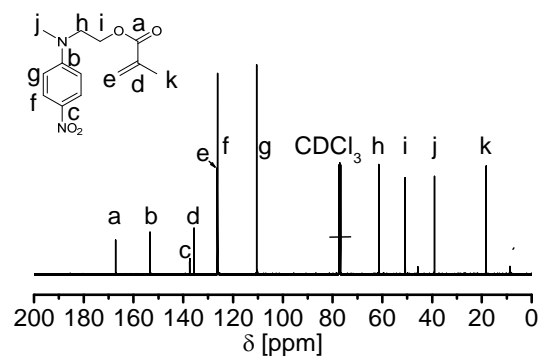

**Figure S11.** <sup>13</sup>C NMR spectrum of NAMA in CDCl<sub>3</sub>.

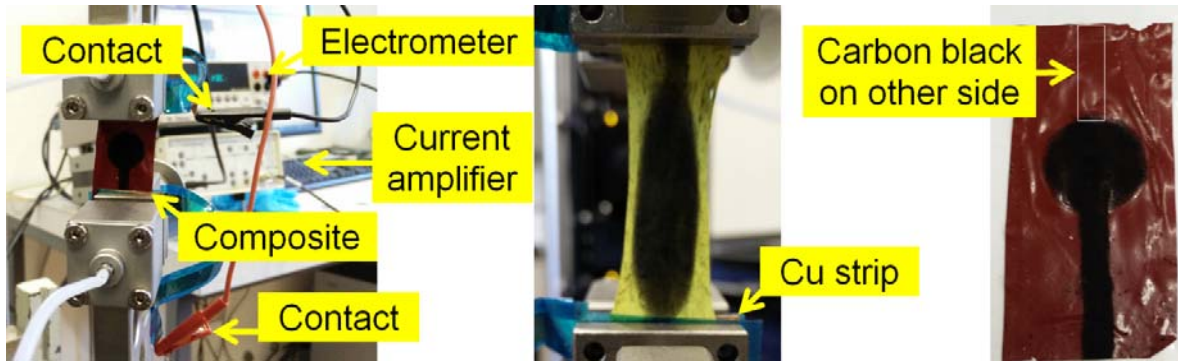

**Figure S12.**  $d_{31}$  test setup with a DR1(33,l) sample before testing (left), a NA(33,h) sample during testing at 150 % strain (middle) and a DR1(40,h) sample after the carbon black electrodes were applied (right).

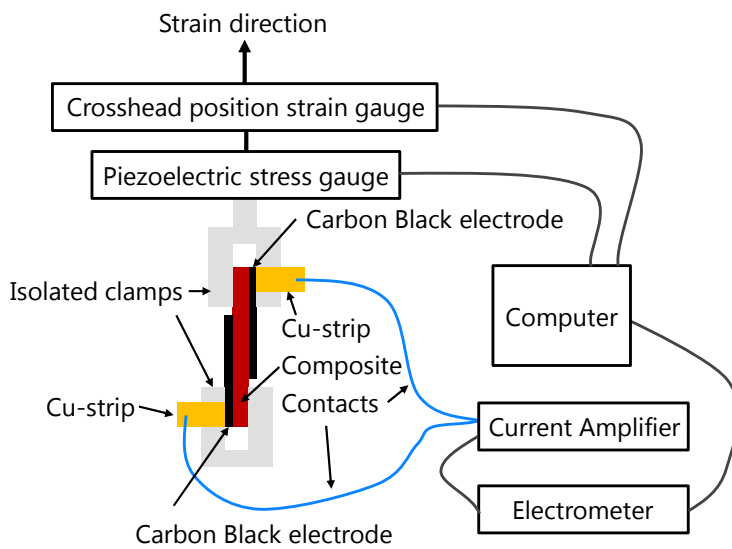

**Figure S13.** Schematic representation of the  $d_{31}$  test setup.

**Table S1.** HN-fit parameter for PMMA-co-NAMA at 130 °C to 190 °C together with the standard error.

| $T$ [°C] | $\epsilon_{\infty}$ | $\Delta\epsilon$ | $\alpha$        | $\beta$         | $\tau$ [s]                                    |
|----------|---------------------|------------------|-----------------|-----------------|-----------------------------------------------|
| 190      | $2.55 \pm 0.73$     | $15.69 \pm 0.78$ | $0.16 \pm 0.02$ | $0.56 \pm 0.07$ | $7.87 \times 10^{-7} \pm 1.01 \times 10^{-7}$ |
| 180      | $2.84 \pm 0.14$     | $17.22 \pm 0.13$ | $0.15 \pm 0.01$ | $0.53 \pm 0.01$ | $2.21 \times 10^{-6} \pm 0.07 \times 10^{-6}$ |
| 170      | $3.27 \pm 0.07$     | $17.95 \pm 0.07$ | $0.17 \pm 0.01$ | $0.55 \pm 0.01$ | $7.04 \times 10^{-6} \pm 0.16 \times 10^{-6}$ |
| 160      | $3.45 \pm 0.03$     | $18.74 \pm 0.03$ | $0.19 \pm 0.01$ | $0.55 \pm 0.01$ | $2.76 \times 10^{-5} \pm 0.04 \times 10^{-5}$ |
| 150      | $3.53 \pm 0.02$     | $19.60 \pm 0.02$ | $0.21 \pm 0.01$ | $0.54 \pm 0.01$ | $1.40 \times 10^{-4} \pm 0.02 \times 10^{-4}$ |
| 140      | $3.57 \pm 0.01$     | $20.62 \pm 0.02$ | $0.23 \pm 0.01$ | $0.51 \pm 0.01$ | $1.02 \times 10^{-3} \pm 0.01 \times 10^{-3}$ |
| 130      | $3.51 \pm 0.05$     | $21.31 \pm 0.07$ | $0.18 \pm 0.01$ | $0.42 \pm 0.01$ | $1.37 \times 10^{-2} \pm 0.05 \times 10^{-2}$ |

**Table S2.** HN-fit parameter for DR1(33,l) at 140 °C to 190 °C together with the standard error.

| $T$ [°C] | $\epsilon_{\infty}$ | $\Delta\epsilon$ | $\alpha$        | $\beta$         | $\tau$ [s]                                    |
|----------|---------------------|------------------|-----------------|-----------------|-----------------------------------------------|
| 190      | $2.33 \pm 0.01$     | $1.35 \pm 0.01$  | $0.15 \pm 0.01$ | $0.56 \pm 0.01$ | $9.27 \times 10^{-6} \pm 0.25 \times 10^{-6}$ |
| 180      | $2.37 \pm 0.01$     | $1.39 \pm 0.01$  | $0.16 \pm 0.01$ | $0.57 \pm 0.01$ | $2.70 \times 10^{-5} \pm 0.07 \times 10^{-6}$ |
| 170      | $2.42 \pm 0.01$     | $1.45 \pm 0.01$  | $0.21 \pm 0.02$ | $0.62 \pm 0.04$ | $9.38 \times 10^{-5} \pm 0.88 \times 10^{-5}$ |
| 160      | $2.45 \pm 0.01$     | $1.51 \pm 0.01$  | $0.18 \pm 0.01$ | $0.54 \pm 0.01$ | $5.54 \times 10^{-4} \pm 0.12 \times 10^{-4}$ |
| 150      | $2.48 \pm 0.01$     | $1.60 \pm 0.01$  | $0.21 \pm 0.01$ | $0.53 \pm 0.01$ | $3.73 \times 10^{-3} \pm 0.09 \times 10^{-3}$ |
| 140      | $2.54 \pm 0.01$     | $1.64 \pm 0.01$  | $0.23 \pm 0.01$ | $0.53 \pm 0.01$ | $3.89 \times 10^{-2} \pm 0.09 \times 10^{-2}$ |

**Table S3.** HN-fit parameter for DR1(40,h) at 140 °C to 190 °C together with the standard error.

| $T$ [°C] | $\epsilon_{\infty}$ | $\Delta\epsilon$ | $\alpha$        | $\beta$         | $\tau$ [s]                                    |
|----------|---------------------|------------------|-----------------|-----------------|-----------------------------------------------|
| 190      | $2.63 \pm 0.02$     | $2.28 \pm 0.02$  | $0.11 \pm 0.01$ | $0.46 \pm 0.02$ | $1.17 \times 10^{-5} \pm 0.06 \times 10^{-5}$ |
| 180      | $2.74 \pm 0.01$     | $2.28 \pm 0.01$  | $0.12 \pm 0.01$ | $0.48 \pm 0.01$ | $3.37 \times 10^{-5} \pm 0.13 \times 10^{-5}$ |
| 170      | $2.82 \pm 0.01$     | $2.32 \pm 0.01$  | $0.12 \pm 0.01$ | $0.49 \pm 0.02$ | $1.28 \times 10^{-4} \pm 0.05 \times 10^{-4}$ |
| 160      | $2.89 \pm 0.01$     | $2.39 \pm 0.01$  | $0.15 \pm 0.01$ | $0.52 \pm 0.01$ | $5.81 \times 10^{-4} \pm 0.11 \times 10^{-4}$ |
| 150      | $2.96 \pm 0.01$     | $2.50 \pm 0.01$  | $0.20 \pm 0.01$ | $0.55 \pm 0.01$ | $3.71 \times 10^{-3} \pm 0.05 \times 10^{-3}$ |
| 140      | $2.96 \pm 0.04$     | $2.59 \pm 0.04$  | $0.41 \pm 0.05$ | $0.37 \pm 0.04$ | $5.58 \times 10^{-2} \pm 0.59 \times 10^{-2}$ |



**Table S4.** HN-fit parameter for NA(33,h) at 130 °C to 180 °C together with the standard error.

| $T$ [°C] | $\epsilon_\infty$ | $\Delta\epsilon$ | $\alpha$        | $\beta$         | $\tau$ [s]                                    |
|----------|-------------------|------------------|-----------------|-----------------|-----------------------------------------------|
| 180      | $2.25 \pm 0.27$   | $2.09 \pm 0.27$  | $0.29 \pm 0.04$ | $0.46 \pm 0.16$ | $1.65 \times 10^{-6} \pm 0.66 \times 10^{-6}$ |
| 170      | $2.40 \pm 0.09$   | $2.05 \pm 0.09$  | $0.29 \pm 0.03$ | $0.45 \pm 0.07$ | $6.25 \times 10^{-6} \pm 1.25 \times 10^{-6}$ |
| 160      | $2.52 \pm 0.04$   | $2.04 \pm 0.04$  | $0.30 \pm 0.02$ | $0.46 \pm 0.04$ | $2.56 \times 10^{-5} \pm 0.33 \times 10^{-5}$ |
| 150      | $2.60 \pm 0.01$   | $2.08 \pm 0.01$  | $0.31 \pm 0.01$ | $0.45 \pm 0.02$ | $1.41 \times 10^{-4} \pm 0.08 \times 10^{-4}$ |
| 140      | $2.66 \pm 0.01$   | $2.15 \pm 0.01$  | $0.33 \pm 0.01$ | $0.43 \pm 0.01$ | $1.10 \times 10^{-3} \pm 0.02 \times 10^{-3}$ |
| 130      | $2.66 \pm 0.03$   | $2.27 \pm 0.03$  | $0.26 \pm 0.03$ | $0.32 \pm 0.03$ | $2.03 \times 10^{-2} \pm 0.20 \times 10^{-2}$ |

## References

- 1 Y. S. Ko, F. A. Nüesch, D. Damjanovic and D. M. Opris, *Adv. Mater.*, 2017, **29**, 1603813.
